# Supplementary material for: Canting angle dependence of single-chain magnet behaviour in chirality-introduced antiferromagnetic chains of acetate-bridged manganese(iii) salen-type complexes
Source: Royal Society of Chemistry journal article supplement (doi:10.1039/d0dt03615c), 2020-01-01
Supplement: d0dt03615c1.pdf [file d0dt03615c1.pdf]

*Supplementary Information*

Canting Angle Dependence of Single-Chain Magnet Behaviour in  
Chirality-Introduced Antiferromagnetic Chains of Acetate-Bridged  
Manganese(III) Salen-Type Complexes

Po-Jung Huang<sup>†</sup> and Hitoshi Miyasaka<sup>\*†‡</sup>

<sup>†</sup> Department of Chemistry, Graduate School of Science, Tohoku University, 6-3 Aramaki-Aza-Aoba,  
Aoba-ku, Sendai 980-8578, Japan

<sup>‡</sup> Institute for Materials Research, Tohoku University, 2-1-1 Katahira, Aoba-ku, Sendai 980-8577,  
Japan

\* Corresponding author:

Hitoshi Miyasaka

Institute for Materials Research, Tohoku University, 2-1-1 Katahira, Aoba-ku, Sendai 980-8577,  
Japan

Tel: +81-22-215-2030

Fax: +81-22-215-2031

e-mail: [miyasaka@imr.tohoku.ac.jp](mailto:miyasaka@imr.tohoku.ac.jp)

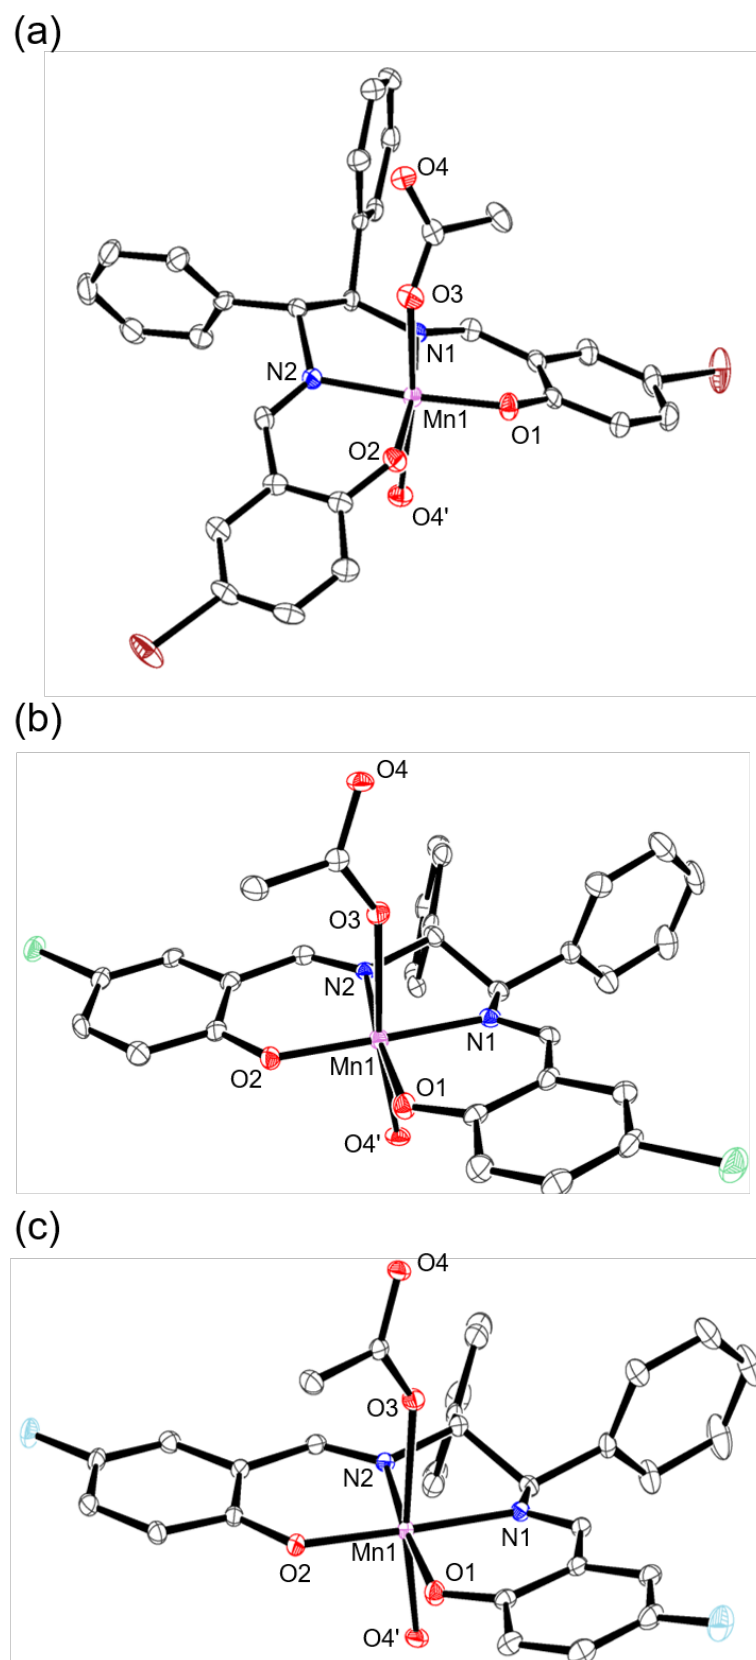

**Figure S1.** ORTEP drawings of core structure of *RR-1* (a), *RR-2* (b), and *RR-3* (c), where colour codes: Mn (purple), O (red), N (blue), C (grey), Br (brown), Cl (green), F (turquoise), and H atoms were omitted for clarity.

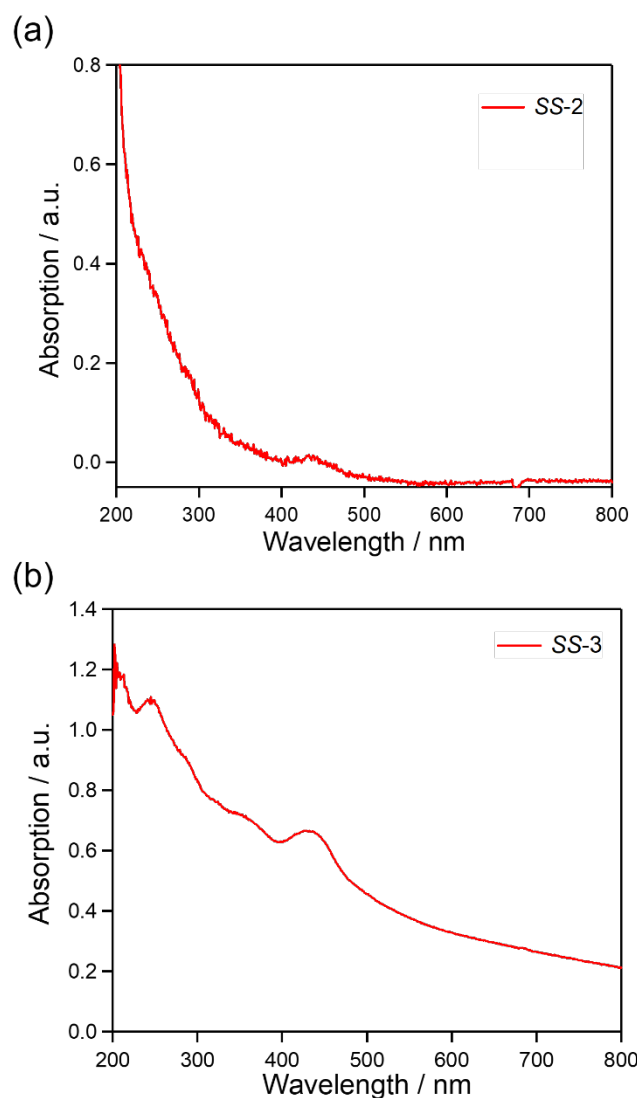

**Figure S2.** Absorption spectra of **SS-2** (a) and **SS-3** (b) collected in KBr pellet.

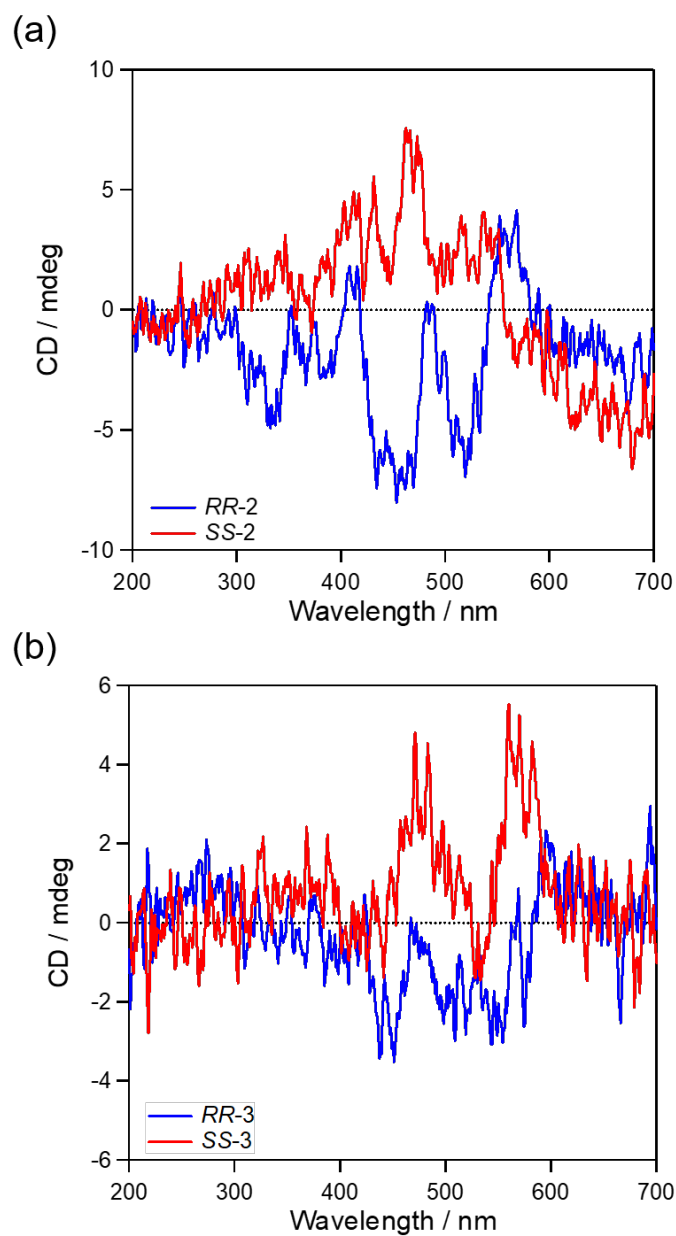

**Figure S3.** CD spectra of *SS/RR-2* (a) and *SS/RR-3* (b) collected in KBr pellet.

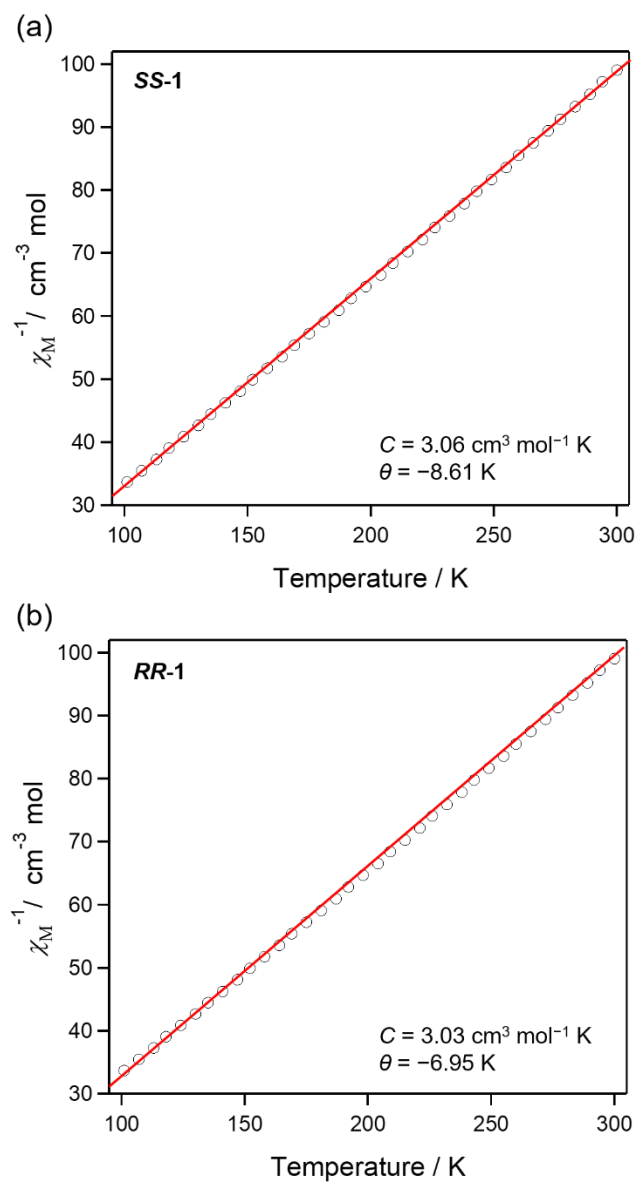

**Figure S4.** Temperature dependence of  $\chi_M^{-1}$  for **SS-1** (a) and **RR-1** (b) in the temperature range 100–300 K under  $H_{\text{dc}} = 1 \text{ kOe}$ . The red coloured linear line is the least-squares fitting line based on Curie law.

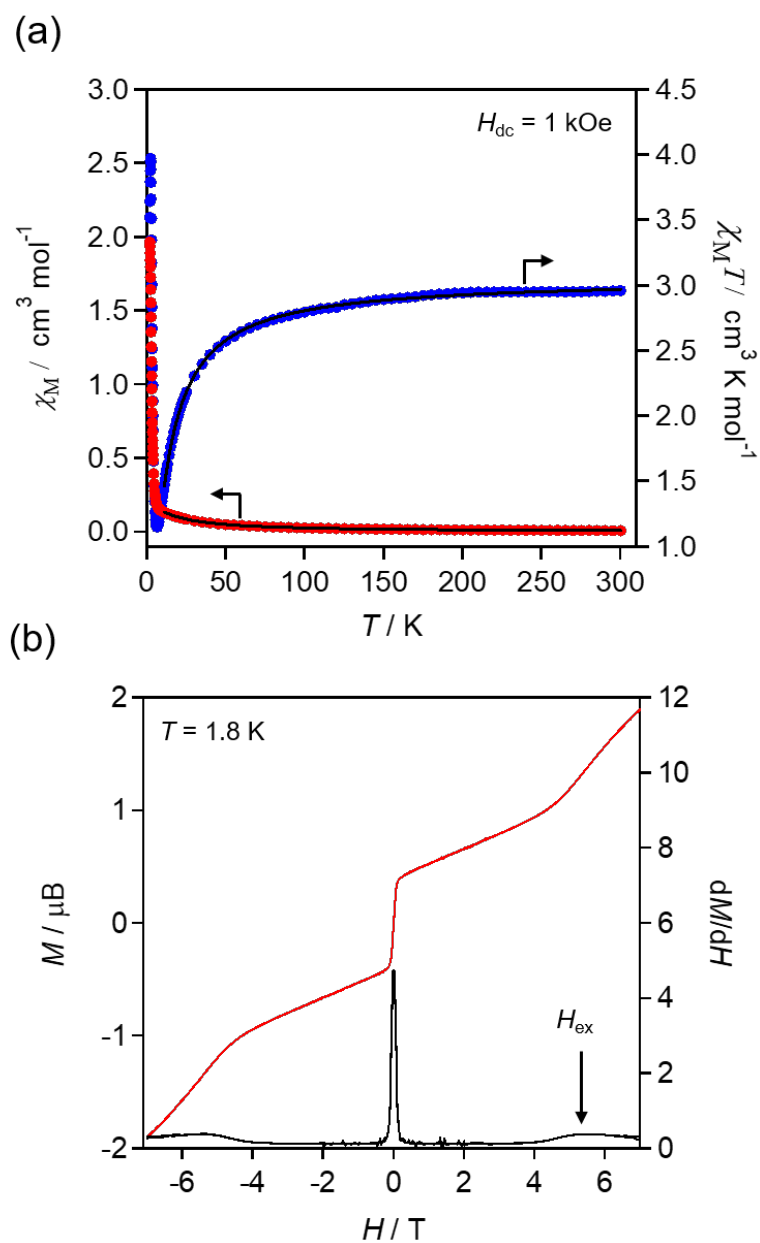

**Figure S5.** Dc magnetic properties of **RR-1**. (a) Temperature dependence of  $\chi_M$  (filled red circles) and  $\chi_M T$  (filled blue circles) under  $H_{dc} = 1$  kOe. The solid black line represents the best fitting line simulated by a Heisenberg  $S = 2$  one-dimensional chain model in the temperature range of 9–300 K. (b) Field dependence of magnetization (red line) and the derivative (black line) at 1.8 K.

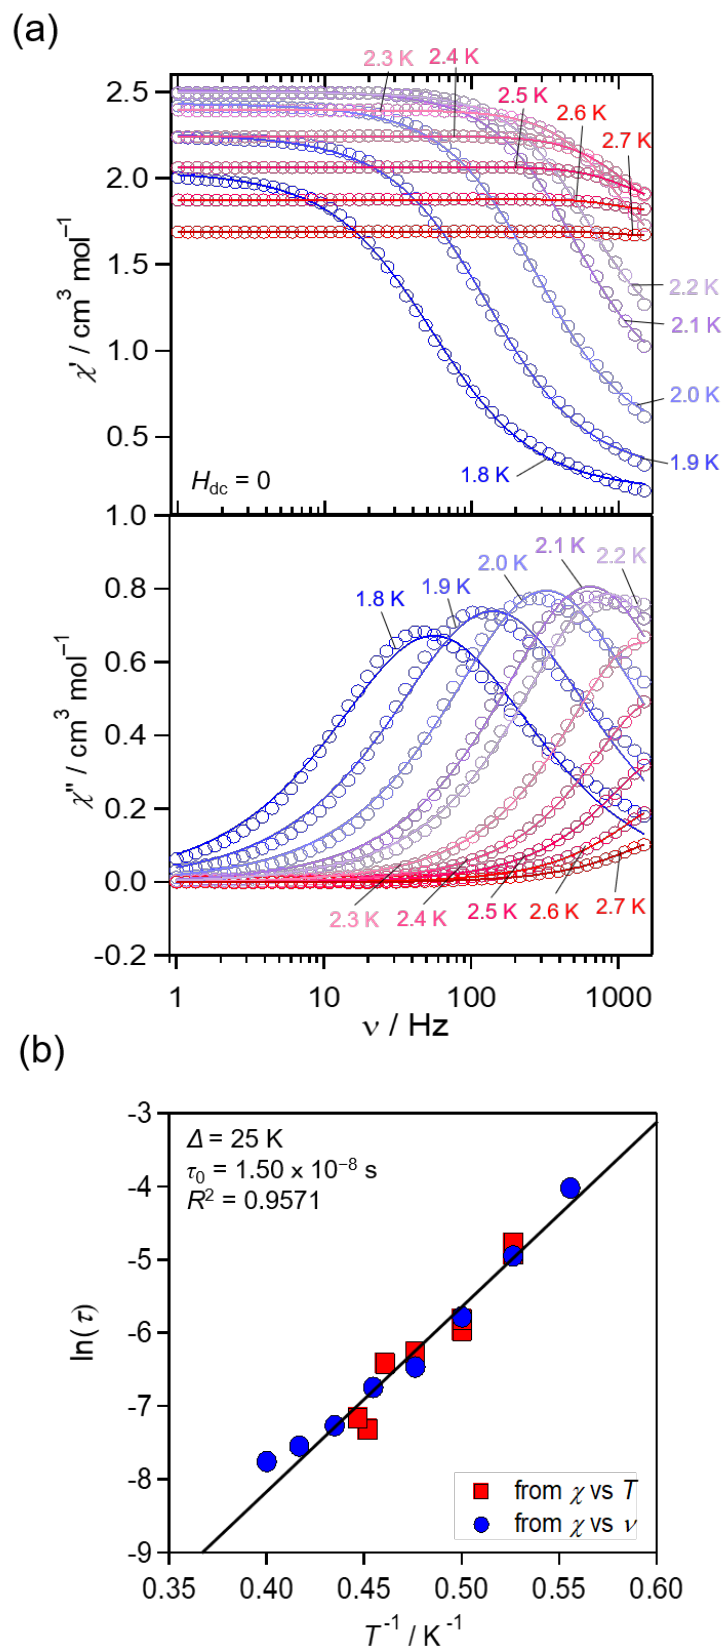

**Figure S6.** Ac magnetic properties of **RR-1**. (a) Frequency dependence of ac magnetic susceptibilities (open circles) with fitting curves (solid lines) and (b) Arrhenius plot of **RR-1** with best fit of temperature dependent (red squares) and frequency dependent (blue circles) data shown in black solid line in zero dc magnetic field.

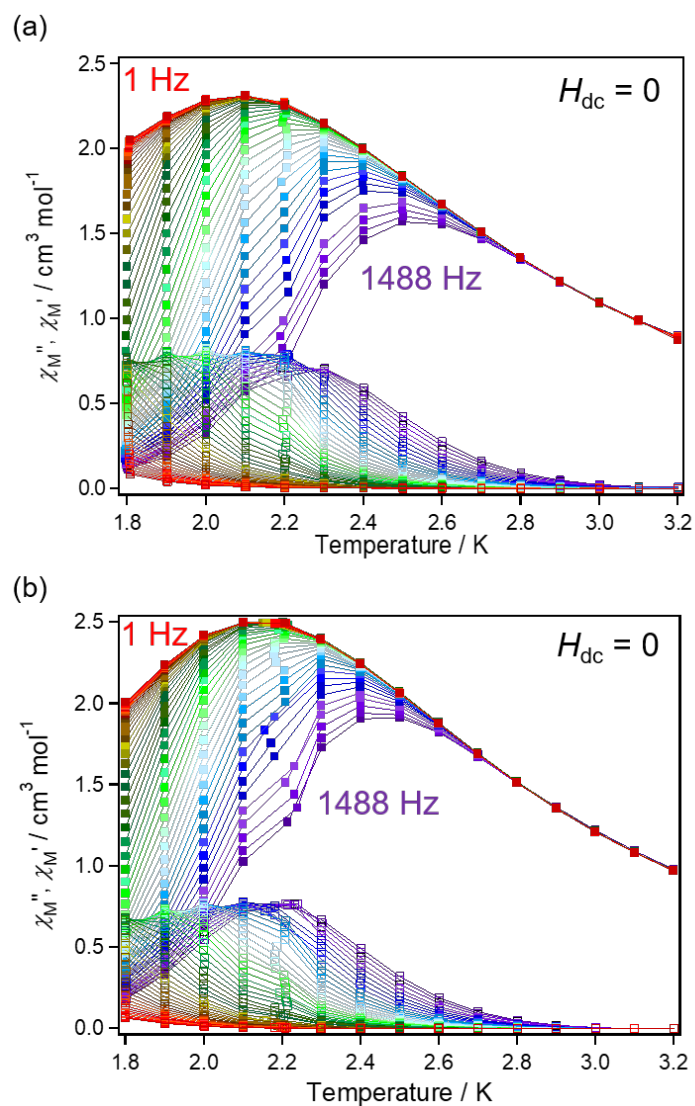

**Figure S7.** Temperature dependence of real part (filled squares) and imaginary part (open squares) ac magnetic susceptibility without external dc magnetic field of **SS-1** (a) and **RR-1** (b). The frequency of ac magnetic was set between 1 and 1488 Hz.



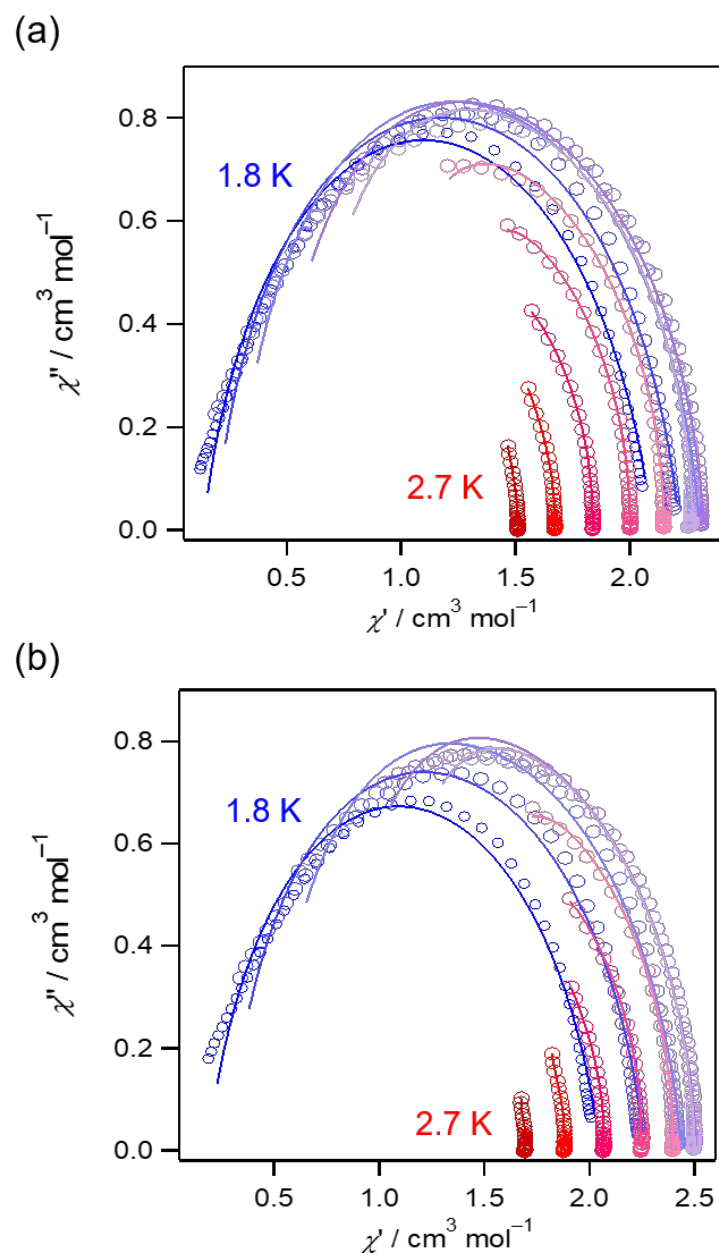

**Figure S8.** Cole-Cole plot using ac magnetic susceptibilities of **SS-1** (a) and **RR-1** (b) without external dc magnetic field.

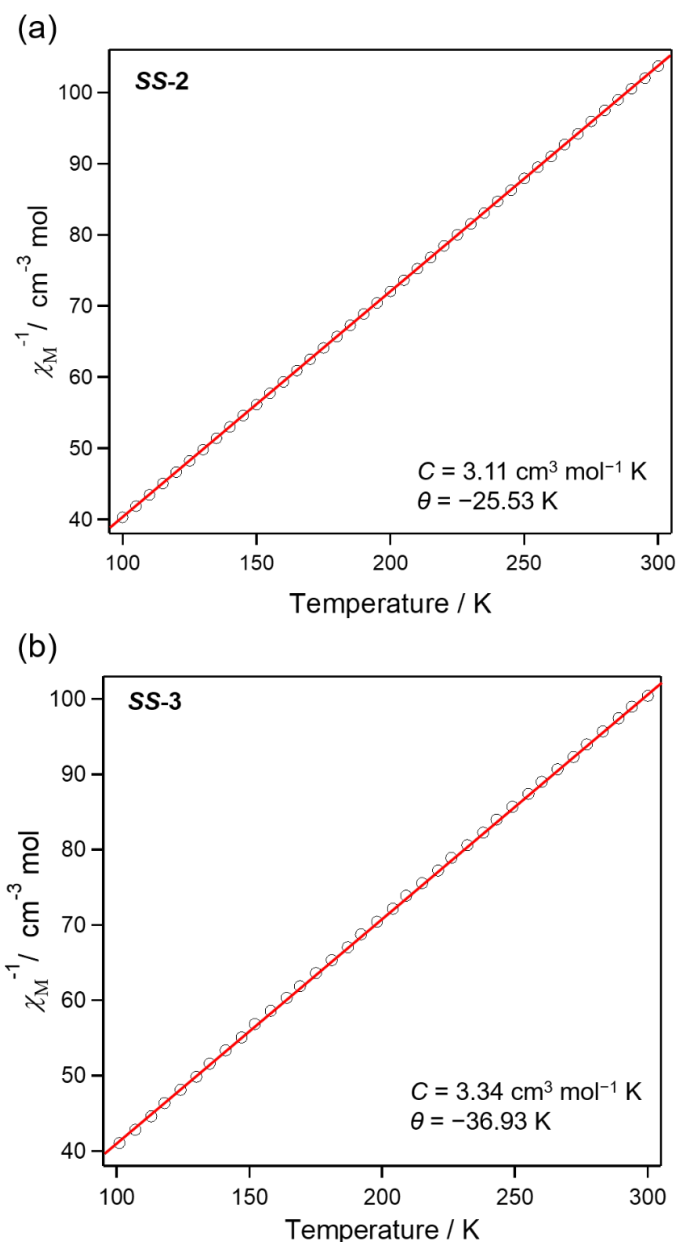

**Figure S9.**  $\chi_M^{-1}$  versus temperature of **SS-2** (a) and **SS-3** (b) at 100–300 K under 1 kOe.

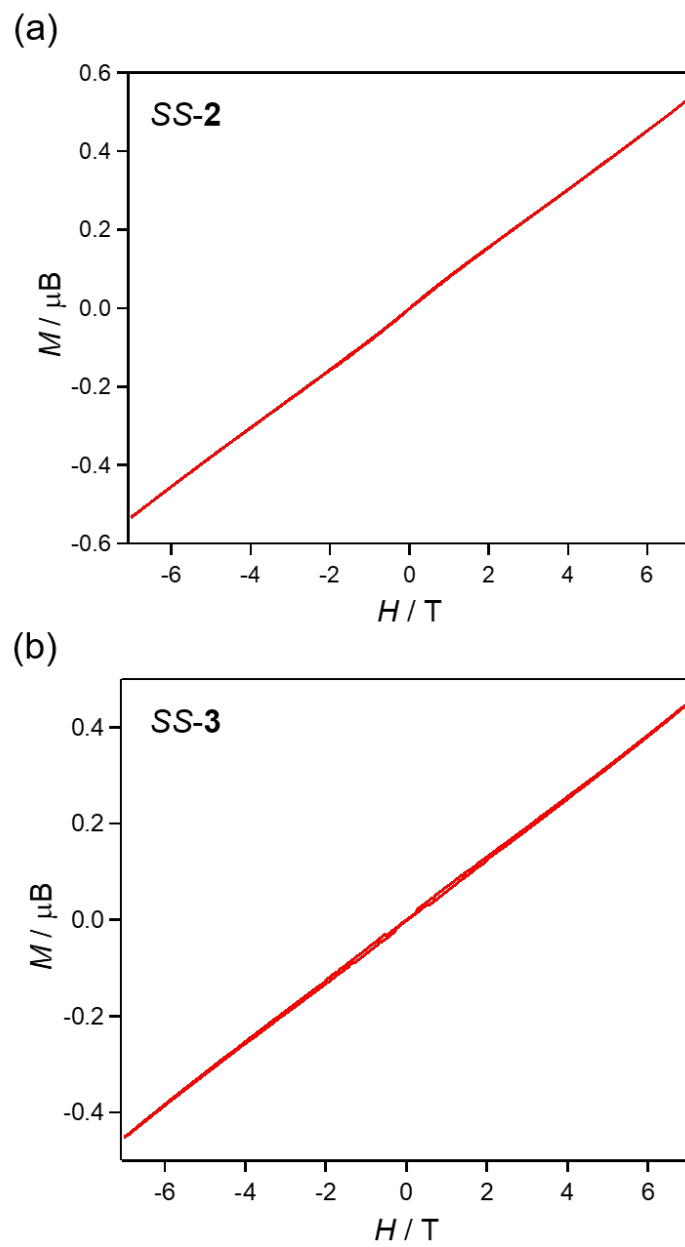

**Figure S10.** Field dependence of magnetization of **SS-2** (a) and **SS-3** (b) at 1.8 K.

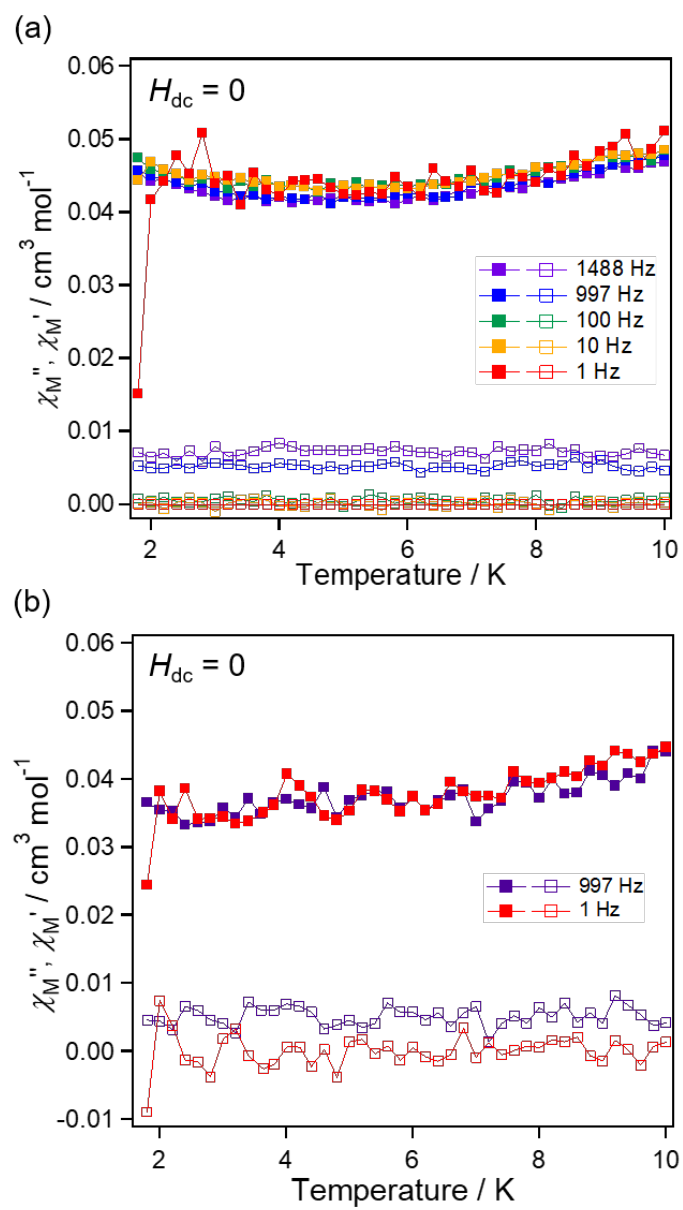

**Figure S11.** Temperature dependence of real part (filled circles) and imagery part (open circles) ac magnetic susceptibility without external dc magnetic field of **SS-2** (a) and **SS-3** (b).

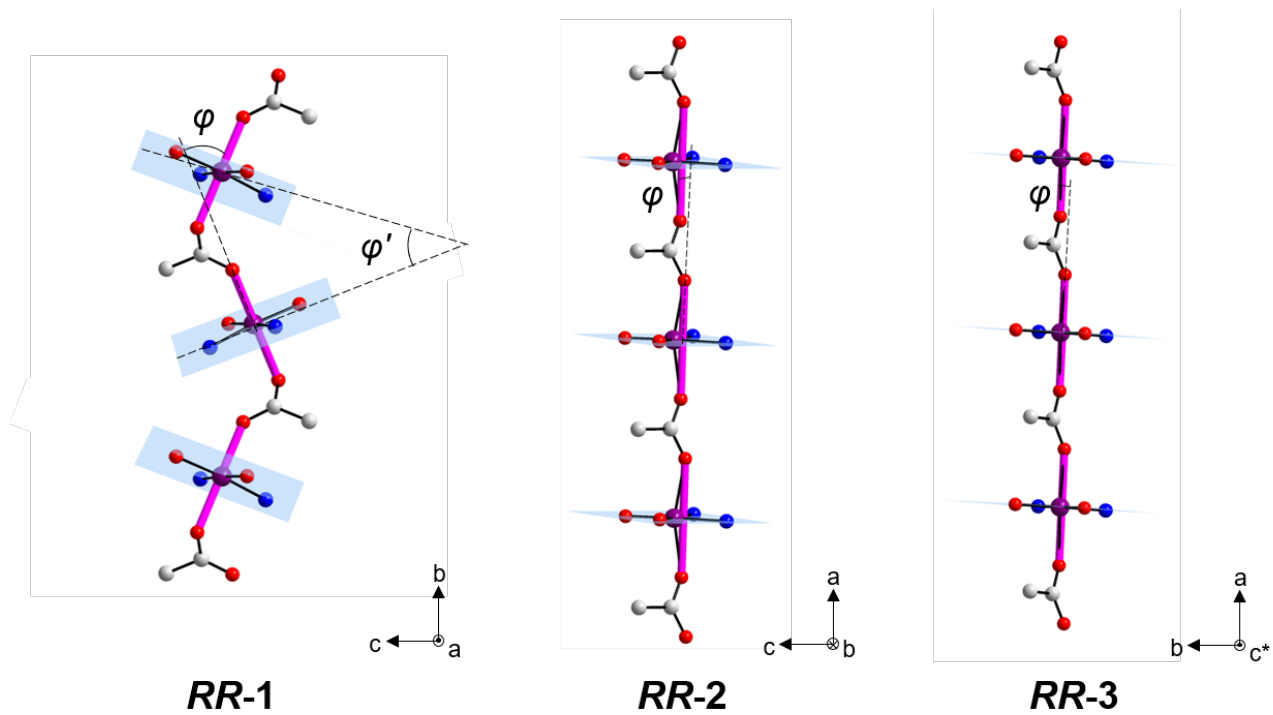

**Figure S12.** Intrachain canting angle  $\varphi$  between the  $\text{O}_{\text{ax}} \cdots \text{O}_{\text{ax}}$  axes (pink rods) and plane-to-plane leaning angle  $\varphi'$  between  $\text{N}_2\text{O}_2\text{Mn}$  equatorial planes (blue planes) in **RR-1**, **RR-2**, and **RR-3** with C atoms of  $\text{Xsal-SS/RRdpda}^{2-}$  ligand, H atoms, and solvent molecules omitted for clarity.

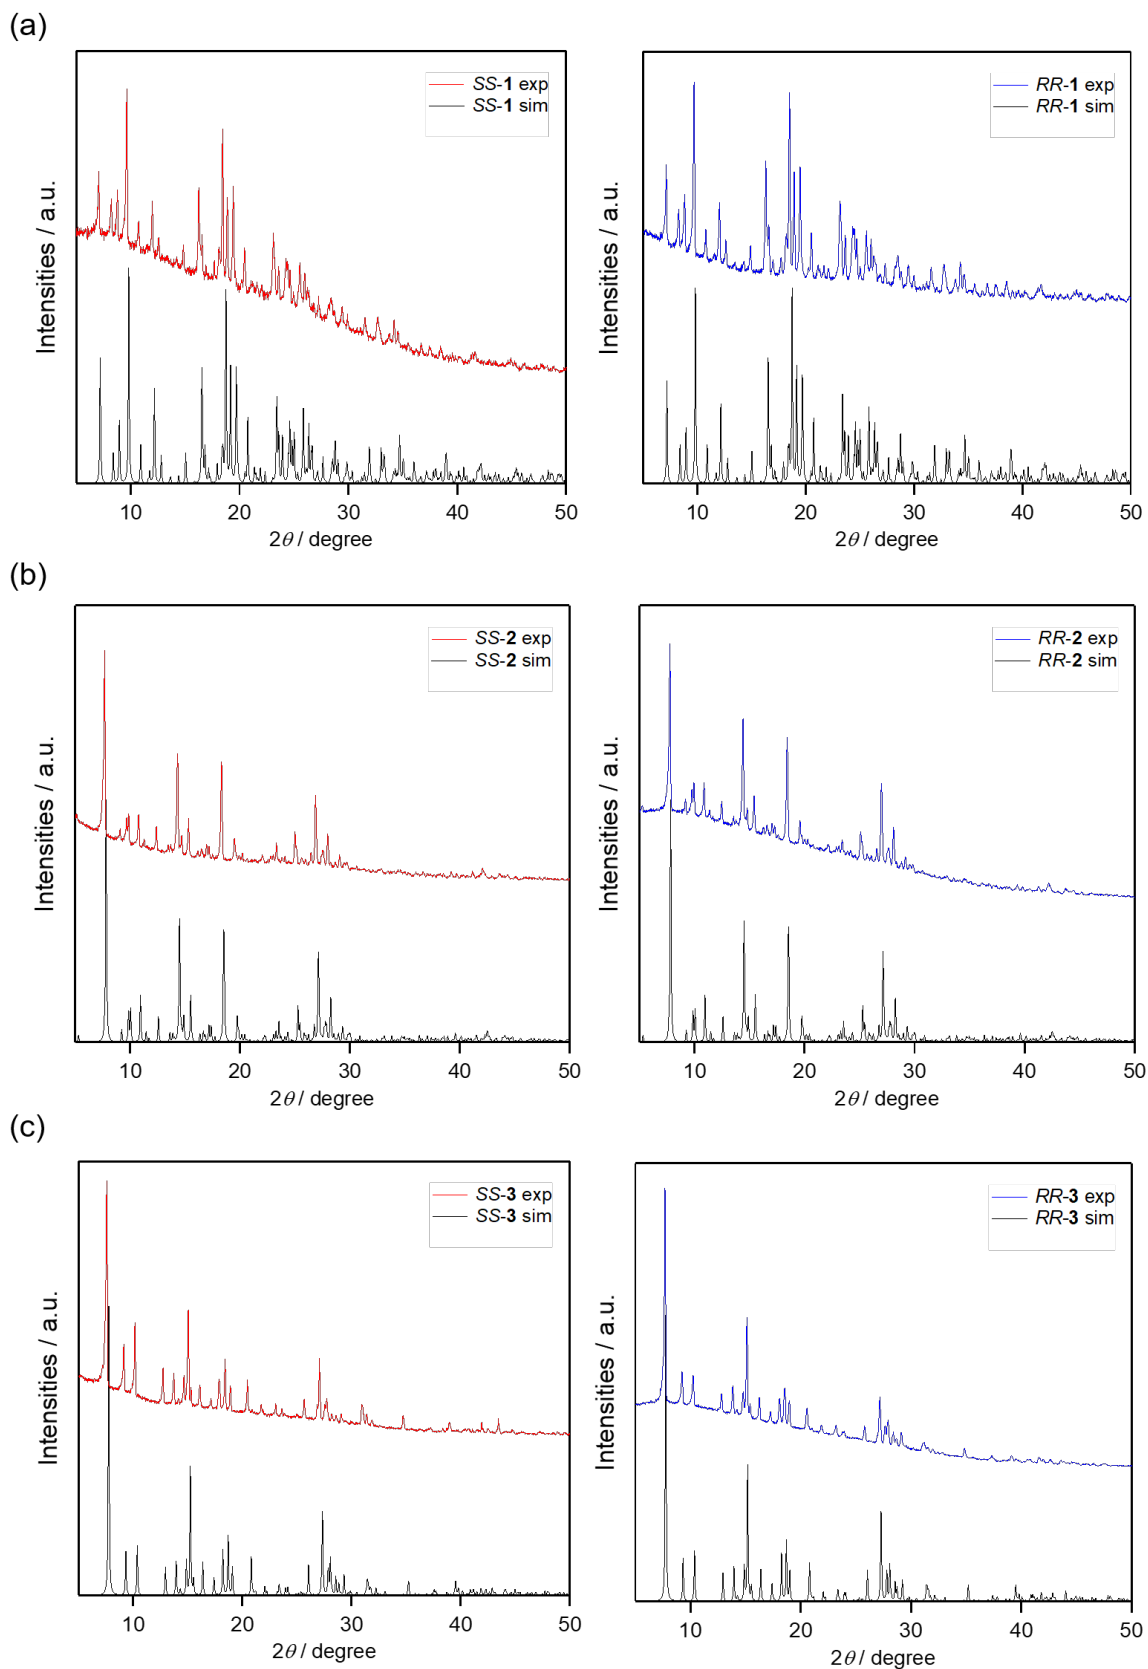

**Figure S13.** Powder X-ray diffraction patterns of *SS/RR-1* (a), *SS/RR-2* (b), and *SS/RR-3* (c).

**Table S1.** Crystallographic data for **SS-1**, **SS-2**, and **SS-3**.

|                                                                                                                    | <b>SS-1</b>                                                                         | <b>SS-2</b>                                                                                     | <b>SS-3</b>                                                                      |
|--------------------------------------------------------------------------------------------------------------------|-------------------------------------------------------------------------------------|-------------------------------------------------------------------------------------------------|----------------------------------------------------------------------------------|
| Formula                                                                                                            | C <sub>31</sub> H <sub>24.5</sub> Br <sub>2</sub> MnN <sub>2.5</sub> O <sub>4</sub> | C <sub>60</sub> H <sub>46</sub> Cl <sub>4</sub> Mn <sub>2</sub> N <sub>4</sub> O <sub>8.7</sub> | C <sub>30</sub> H <sub>23</sub> F <sub>2</sub> MnN <sub>2</sub> O <sub>4.5</sub> |
| Formula weight                                                                                                     | 710.79                                                                              | 1213.89                                                                                         | 576.44                                                                           |
| Crystal system                                                                                                     | Tetragonal                                                                          | Orthorhombic                                                                                    | Monoclinic                                                                       |
| Space group                                                                                                        | <i>P</i> 4 <sub>3</sub> 2 <sub>1</sub> 2                                            | <i>P</i> 2 <sub>1</sub> 2 <sub>1</sub> 2 <sub>1</sub>                                           | <i>P</i> 2 <sub>1</sub>                                                          |
| <i>a</i> (Å)                                                                                                       | 10.7928(3)                                                                          | 6.5703(2)                                                                                       | 6.5321(4)                                                                        |
| <i>b</i> (Å)                                                                                                       | 10.7928(3)                                                                          | 17.9817(4)                                                                                      | 17.0704(7)                                                                       |
| <i>c</i> (Å)                                                                                                       | 49.2053(11)                                                                         | 45.3393(13)                                                                                     | 11.7309(8)                                                                       |
| $\alpha$ (°)                                                                                                       | 90                                                                                  | 90                                                                                              | 90                                                                               |
| $\beta$ (°)                                                                                                        | 90                                                                                  | 90                                                                                              | 103.224(6)                                                                       |
| $\gamma$ (°)                                                                                                       | 90                                                                                  | 90                                                                                              | 90                                                                               |
| <i>V</i> (Å <sup>3</sup> )                                                                                         | 5731.7(3)                                                                           | 5356.6(3)                                                                                       | 1273.37(13)                                                                      |
| <i>Z</i>                                                                                                           | 8                                                                                   | 4                                                                                               | 2                                                                                |
| <i>T</i> (K)                                                                                                       | 103                                                                                 | 103                                                                                             | 103                                                                              |
| <i>D</i> <sub>calc</sub> (g/cm <sup>3</sup> )                                                                      | 1.647                                                                               | 1.505                                                                                           | 1.503                                                                            |
| $\mu$ (mm <sup>-1</sup> )                                                                                          | 3.290                                                                               | 0.734                                                                                           | 0.576                                                                            |
| Unique reflns [R(int)]                                                                                             | 4699 [0.1698]                                                                       | 10522 [0.1065]                                                                                  | 4347 [0.0456]                                                                    |
| <i>R</i> <sub>1</sub> <sup>[a]</sup> , <i>wR</i> <sub>2</sub> <sup>[b]</sup> [ <i>I</i> > 2 $\sigma$ ( <i>I</i> )] | 0.0749, 0.1182                                                                      | 0.0696, 0.1095                                                                                  | 0.0535, 0.0901                                                                   |
| <i>R</i> <sub>1</sub> , <i>wR</i> <sub>2</sub> (all data)                                                          | 0.1819, 0.1451                                                                      | 0.1266, 0.1271                                                                                  | 0.0889, 0.1008                                                                   |
| Flack parameter ( <i>x</i> )                                                                                       | -0.030(9)                                                                           | -0.016(15)                                                                                      | 0.002(19)                                                                        |
| CCDC No.                                                                                                           | 2036017                                                                             | 2036018                                                                                         | 2036019                                                                          |

[a]  $R_1 = (\sum ||F_o| - |F_c| |) / \sum |F_o|$ , [b]  $wR_2 = \{\sum [w(F_o^2 - F_c^2)^2] / \sum [w(F_o^2)]^2\}^{1/2}$

**Table S2.** Crystallographic data for **RR-1**, **RR-2**, and **RR-3**.

|                                                                                                                   | <b>RR-1</b>                                                                         | <b>RR-2</b>                                                                                     | <b>RR-3</b>                                                                      |
|-------------------------------------------------------------------------------------------------------------------|-------------------------------------------------------------------------------------|-------------------------------------------------------------------------------------------------|----------------------------------------------------------------------------------|
| Formula                                                                                                           | C <sub>31</sub> H <sub>24.5</sub> Br <sub>2</sub> MnN <sub>2.5</sub> O <sub>4</sub> | C <sub>60</sub> H <sub>46</sub> Cl <sub>4</sub> Mn <sub>2</sub> N <sub>4</sub> O <sub>8.7</sub> | C <sub>30</sub> H <sub>23</sub> F <sub>2</sub> MnN <sub>2</sub> O <sub>4.5</sub> |
| Formula weight                                                                                                    | 710.79                                                                              | 1213.89                                                                                         | 576.44                                                                           |
| Crystal system                                                                                                    | Tetragonal                                                                          | Orthorhombic                                                                                    | Monoclinic                                                                       |
| Space group                                                                                                       | <i>P</i> 4 <sub>1</sub> 2 <sub>1</sub> 2                                            | <i>P</i> 2 <sub>1</sub> 2 <sub>1</sub> 2 <sub>1</sub>                                           | <i>P</i> 2 <sub>1</sub>                                                          |
| <i>a</i> (Å)                                                                                                      | 10.79470(10)                                                                        | 6.57530(10)                                                                                     | 6.5420(2)                                                                        |
| <i>b</i> (Å)                                                                                                      | 10.79470(10)                                                                        | 17.9896(4)                                                                                      | 17.0906(4)                                                                       |
| <i>c</i> (Å)                                                                                                      | 49.2881(7)                                                                          | 45.3418(7)                                                                                      | 11.7543(3)                                                                       |
| $\alpha$ (°)                                                                                                      | 90                                                                                  | 90                                                                                              | 90                                                                               |
| $\beta$ (°)                                                                                                       | 90                                                                                  | 90                                                                                              | 103.659(3)                                                                       |
| $\gamma$ (°)                                                                                                      | 90                                                                                  | 90                                                                                              | 90                                                                               |
| <i>V</i> (Å <sup>3</sup> )                                                                                        | 5743.32(13)                                                                         | 5363.35(17)                                                                                     | 1277.04(6)                                                                       |
| <i>Z</i>                                                                                                          | 8                                                                                   | 4                                                                                               | 2                                                                                |
| <i>T</i> (K)                                                                                                      | 103                                                                                 | 103                                                                                             | 103                                                                              |
| <i>D</i> <sub>calc</sub> (g/cm <sup>3</sup> )                                                                     | 1.644                                                                               | 1.503                                                                                           | 1.499                                                                            |
| $\mu$ (mm <sup>-1</sup> )                                                                                         | 3.283                                                                               | 0.733                                                                                           | 0.574                                                                            |
| Unique reflns [R(int)]                                                                                            | 7425 [0.0580]                                                                       | 12336 [0.1065]                                                                                  | 6322 [0.0236]                                                                    |
| <i>R</i> <sub>1</sub> <sup>[a]</sup> , <i>wR</i> <sub>2</sub> <sup>[b]</sup> [ <i>I</i> >2 $\sigma$ ( <i>I</i> )] | 0.0472, 0.0794                                                                      | 0.0391, 0.0794                                                                                  | 0.0298, 0.0716                                                                   |
| <i>R</i> <sub>1</sub> , <i>wR</i> <sub>2</sub> (all data)                                                         | 0.0670, 0.0845                                                                      | 0.0514, 0.0838                                                                                  | 0.0311, 0.0723                                                                   |
| Flack parameter ( <i>x</i> )                                                                                      | -0.005(4)                                                                           | -0.013(9)                                                                                       | -0.017(7)                                                                        |
| CCDC No.                                                                                                          | 2036014                                                                             | 2036015                                                                                         | 2036016                                                                          |

[a]  $R_1 = (\sum ||F_o| - |F_c| |) / \sum |F_o|$ , [b]  $wR_2 = \{\sum [w(F_o^2 - F_c^2)^2] / \sum [w(F_o^2)]^2\}^{1/2}$



**Table S3.** Selected bond lengths and angles of *SS-1* and *RR-1*.

|                   | <i>SS-1</i> | <i>RR-1</i> |
|-------------------|-------------|-------------|
| Mn(1)–O(1)        | 1.884(5)    | 1.899(3)    |
| Mn(1)–O(2)        | 1.904(5)    | 1.886(3)    |
| Mn(1)–O(3)        | 2.146(6)    | 2.147(3)    |
| Mn(1)–O(4)#1      | 2.196(5)    | 2.198(3)    |
| Mn(1)–N(1)        | 2.003(6)    | 2.004(3)    |
| Mn(1)–N(2)        | 1.997(6)    | 1.994(3)    |
| O(1)–Mn(1)–O(2)   | 94.7(2)     | 94.79(12)   |
| O(1)–Mn(1)–O(3)   | 94.1(2)     | 94.00(12)   |
| O(1)–Mn(1)–O(4)#1 | 93.5(2)     | 86.38(11)   |
| O(1)–Mn(1)–N(1)   | 93.3(2)     | 91.37(12)   |
| O(1)–Mn(1)–N(2)   | 173.9(2)    | 171.68(14)  |
| O(2)–Mn(1)–O(3)   | 93.8(2)     | 94.21(12)   |
| O(2)–Mn(1)–O(4)#1 | 86.6(2)     | 93.38(12)   |
| O(2)–Mn(1)–N(1)   | 171.5(3)    | 173.84(13)  |
| O(2)–Mn(1)–N(2)   | 91.4(2)     | 93.05(13)   |
| O(3)–Mn(1)–O(4)#1 | 172.4(2)    | 172.34(11)  |
| O(3)–Mn(1)–N(1)   | 88.3(2)     | 85.33(12)   |
| O(3)–Mn(1)–N(2)   | 85.2(2)     | 88.17(12)   |
| O(4)#1–Mn(1)–N(1) | 90.2(2)     | 87.01(12)   |
| O(4)#1–Mn(1)–N(2) | 87.2(2)     | 90.41(12)   |

**Symmetry operation**#1  $1/2-x, 1/2+y, 3/4-z$ #1  $3/2-x, -1/2+y, 5/4-z$

**Table S4.** Selected bond lengths and angles of *SS-2* and *RR-2*.

|                           | <i>SS-2</i>     | <i>RR-2</i>     |
|---------------------------|-----------------|-----------------|
| Mn(1)–O(1)                | 1.872(3)        | 1.874(2)        |
| Mn(1)–O(2)                | 1.903(3)        | 1.902(2)        |
| Mn(1)–O(3)                | 2.205(3)        | 2.208(2)        |
| Mn(1)–O(4)#2              | 2.226(4)        | 2.225(2)        |
| Mn(1)–N(1)                | 2.000(4)        | 2.002(3)        |
| Mn(1)–N(2)                | 1.990(4)        | 1.996(3)        |
| Mn(2)–O(5)                | 1.886(4)        | 1.893(2)        |
| Mn(2)–O(6)                | 1.891(3)        | 1.887(2)        |
| Mn(2)–O(7)                | 2.217(4)        | 2.213(2)        |
| Mn(2)–O(8)#1              | 2.233(3)        | 2.232(2)        |
| Mn(2)–N(3)                | 1.990(4)        | 1.995(3)        |
| Mn(2)–N(4)                | 1.994(4)        | 1.996(2)        |
| O(1)–Mn(1)–O(2)           | 93.20(14)       | 93.24(9)        |
| O(1)–Mn(1)–O(3)           | 96.45(16)       | 96.54(10)       |
| O(1)–Mn(1)–O(4)#2         | 96.89(16)       | 96.65(10)       |
| O(1)–Mn(1)–N(1)           | 91.43(15)       | 91.37(12)       |
| O(1)–Mn(1)–N(2)           | 174.16(15)      | 174.06(11)      |
| O(2)–Mn(1)–O(3)           | 95.13(15)       | 95.04(10)       |
| O(2)–Mn(1)–O(4)#2         | 95.78(15)       | 95.72(10)       |
| O(2)–Mn(1)–N(1)           | 174.96(16)      | 174.98(10)      |
| O(2)–Mn(1)–N(2)           | 92.62(15)       | 92.68(10)       |
| O(3)–Mn(1)–O(4)#2         | 162.24(13)      | 162.44(8)       |
| O(3)–Mn(1)–N(1)           | 86.31(15)       | 86.35(10)       |
| O(3)–Mn(1)–N(2)           | 82.61(16)       | 82.42(10)       |
| O(4)#2–Mn(1)–N(1)         | 81.69(15)       | 81.80(10)       |
| O(4)#2–Mn(1)–N(2)         | 82.93(16)       | 83.25(10)       |
| O(5)–Mn(2)–O(6)           | 92.35(14)       | 92.74(10)       |
| O(5)–Mn(2)–O(7)           | 96.64(15)       | 96.53(10)       |
| O(5)–Mn(2)–O(8)#1         | 96.97(15)       | 97.09(10)       |
| O(5)–Mn(2)–N(3)           | 92.27(16)       | 91.37(12)       |
| O(5)–Mn(2)–N(4)           | 174.83(15)      | 174.85(11)      |
| O(6)–Mn(2)–O(7)           | 97.18(15)       | 97.13(10)       |
| O(6)–Mn(2)–O(8)#1         | 96.56(15)       | 96.55(10)       |
| O(6)–Mn(2)–N(3)           | 174.71(17)      | 174.51(11)      |
| O(6)–Mn(2)–N(4)           | 92.67(15)       | 92.24(10)       |
| O(7)–Mn(2)–O(8)#1         | 160.20(13)      | 160.17(8)       |
| O(7)–Mn(2)–N(3)           | 84.83(16)       | 84.94(10)       |
| O(7)–Mn(2)–N(4)           | 81.51(16)       | 81.56(10)       |
| O(8)#1–Mn(2)–N(3)         | 80.33(15)       | 80.24(10)       |
| O(8)#1–Mn(2)–N(4)         | 83.67(15)       | 93.62(10)       |
| <b>Symmetry operation</b> |                 |                 |
|                           | #1 $-1+x, y, z$ | #1 $1+x, y, z$  |
|                           | #2 $1+x, y, z$  | #2 $-1+x, y, z$ |

**Table S5.** Selected bond lengths and angles of *SS-3* and *RR-3*.

|                           | <i>SS-3</i>  | <i>RR-3</i>   |
|---------------------------|--------------|---------------|
| Mn(1)–O(1)                | 1.878(3)     | 1.8826(16)    |
| Mn(1)–O(2)                | 1.878(3)     | 1.8829(15)    |
| Mn(1)–O(3)                | 2.200(3)     | 2.2049(13)    |
| Mn(1)–O(4)#1              | 2.213(2)     | 2.2149(13)    |
| Mn(1)–N(1)                | 1.996(3)     | 1.9999(18)    |
| Mn(1)–N(2)                | 1.991(4)     | 1.9986(18)    |
| O(1)–Mn(1)–O(2)           | 92.17(13)    | 92.17(7)      |
| O(1)–Mn(1)–O(3)           | 97.64(12)    | 95.30(6)      |
| O(1)–Mn(1)–O(4)#1         | 97.47(12)    | 96.34(7)      |
| O(1)–Mn(1)–N(1)           | 91.75(14)    | 92.71(7)      |
| O(1)–Mn(1)–N(2)           | 175.28(14)   | 175.88(8)     |
| O(2)–Mn(1)–O(3)           | 95.00(12)    | 97.79(6)      |
| O(2)–Mn(1)–O(4)#2         | 96.07(13)    | 97.29(6)      |
| O(2)–Mn(1)–N(1)           | 176.02(15)   | 175.12(8)     |
| O(2)–Mn(1)–N(2)           | 92.55(13)    | 91.88(8)      |
| O(3)–Mn(1)–O(4)#2         | 160.88(10)   | 160.55(5)     |
| O(3)–Mn(1)–N(1)           | 85.15(12)    | 81.77(6)      |
| O(3)–Mn(1)–N(2)           | 81.88(12)    | 84.89(7)      |
| O(4)#2–Mn(1)–N(1)         | 82.74(13)    | 82.15(6)      |
| O(4)#2–Mn(1)–N(2)         | 82.09(12)    | 82.40(7)      |
| <b>Symmetry operation</b> |              |               |
|                           | #1 1+x, y, z | #1 -1+x, y, z |

**Table S6.** Fitting parameter of the dc magnetic susceptibilities of *SS-1*, *SS-2*, and *SS-3*.

|                     | <b>SS-1</b> | <b>SS-2</b> | <b>SS-3</b> |
|---------------------|-------------|-------------|-------------|
| $g$                 | 2.04(5)     | 2.04(0)     | 2.12(0)     |
| $J(\text{cm}^{-1})$ | -1.04(2)    | -2.67(1)    | -3.01(3)    |
| $D(\text{cm}^{-1})$ | -1.22(0)    | -2.95(7)    | -2.24(4)    |
